# Supplementary material
Source: Springer Nature journal article supplement (https://www.springermedizin.de/resource/supplementary/12965_2009_75_MOESM1_ESM.pdf/9573066)
Supplement: MOESM1 [file 9573066]

# Regimen 1

- Day 0                      Day 14   Day 15
- 1<sup>st</sup> dose                      2<sup>nd</sup> dose   s.c. Tumour Inoculation

# Regimen 2

- Day 0   Day 7   Day 14
- 1<sup>st</sup> dose   2<sup>nd</sup> dose   s.c. Tumour Inoculation

# Regimen 3

- Day 0   Day 7   Day 14   Day 21   Day 28
- 1<sup>st</sup> dose   2<sup>nd</sup> dose   3<sup>rd</sup> dose   4<sup>th</sup> dose   s.c. Tumour inoculation
